# Supplementary material
Source: publisher site journal article supplement (https://www.dovepress.com/article/558675)
Supplement: Supplementary file 1 [file 558675%20Supplementary%20Material.docx]

## Engineered Cancer Cell Membrane-Functionalized Metal-organic Frameworks for Irinotecan/Curcumin Codelivery in Colorectal Cancer: Enhanced Efficacy and Mitigated Toxicity

## Shuiling Jin1†, Aifang Zhou2†, Qi Zhang1†, Di Zhao2, Xintong Dong2, Hong-Min Meng2, Zhengquan Yu1, Zhaohui Li1

1 The First Affiliated Hospital of Zhengzhou University, Zhengzhou, Henan Province, China.

2 College of Chemistry, Zhengzhou University, Zhengzhou, Henan Province, China.

**†**Authors contributed equally to this work

Corresponding authors: hmmeng2017@zzu.edu.cn (H-M. Meng), zhaohui.li@zzu.edu.cn (Z. Li).

**Supplementary figures**

**
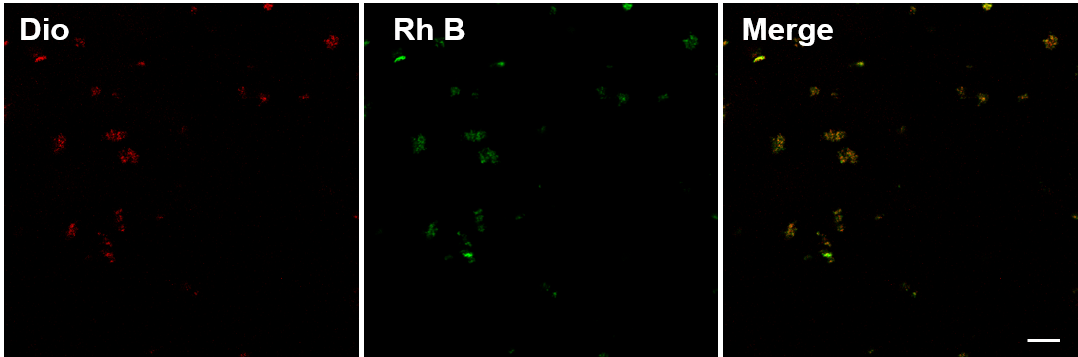
**

**Figure S1.** The preparation of MCM was assessed by confocal laser scanning microscopy. Scale bar: 25 m.


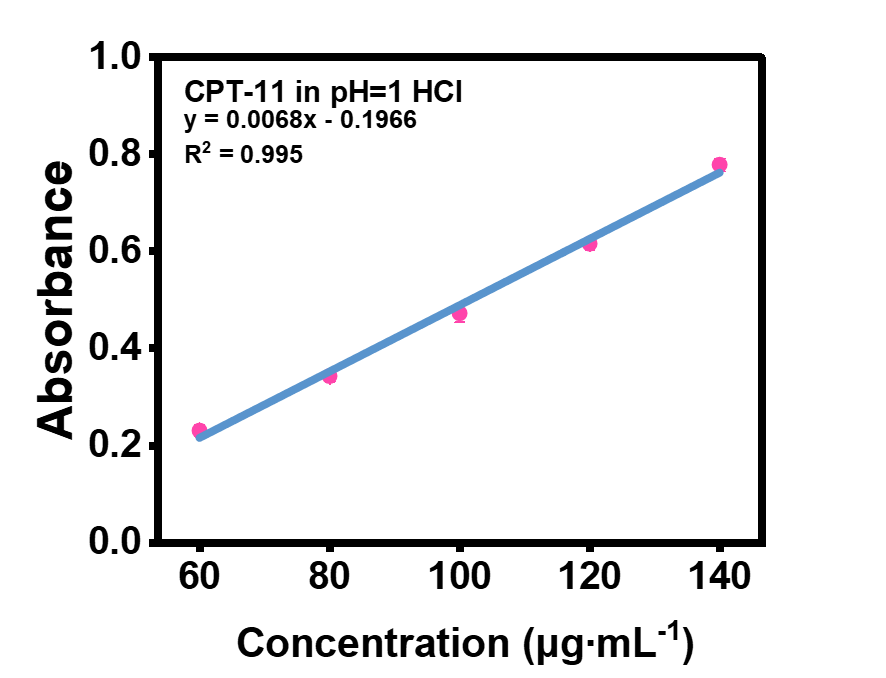


**Figure S2.** The relationship of the absorbance value at 370 nm with different concentrations of CPT-11 in pH=1 solution.


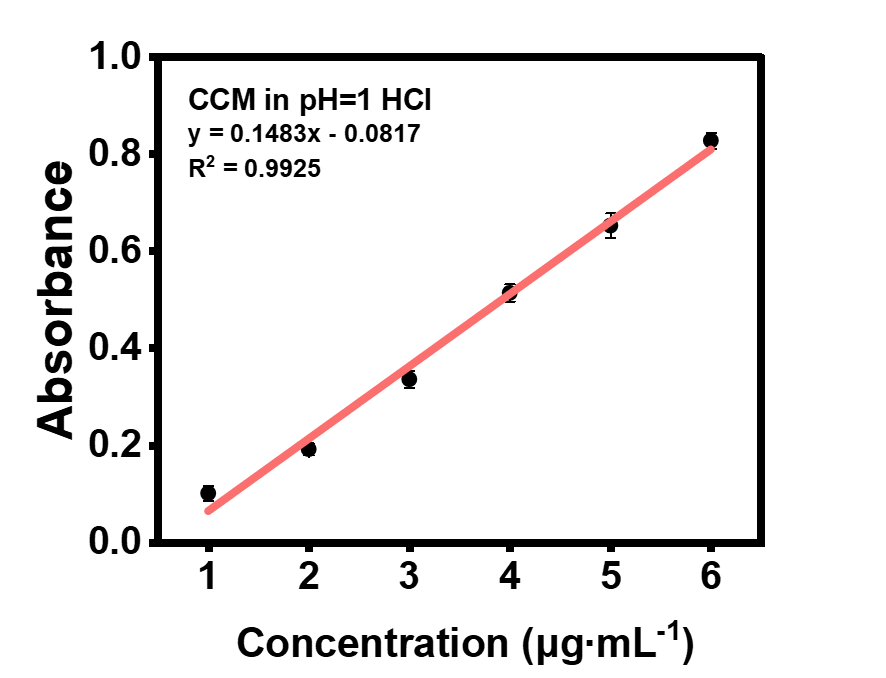


**Figure S3.** The relationship of the absorbance value at 420 nm with different concentrations of CCM in pH=1 solution.


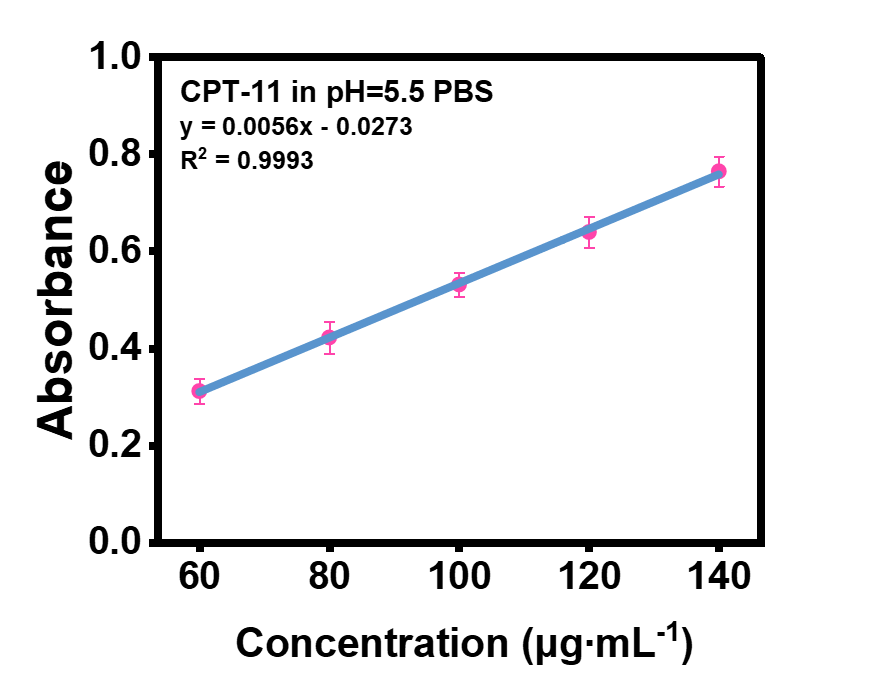


**Figure S4.** The relationship of the absorbance value at 370 nm with different concentrations of CPT-11 in pH=5.5 solution.


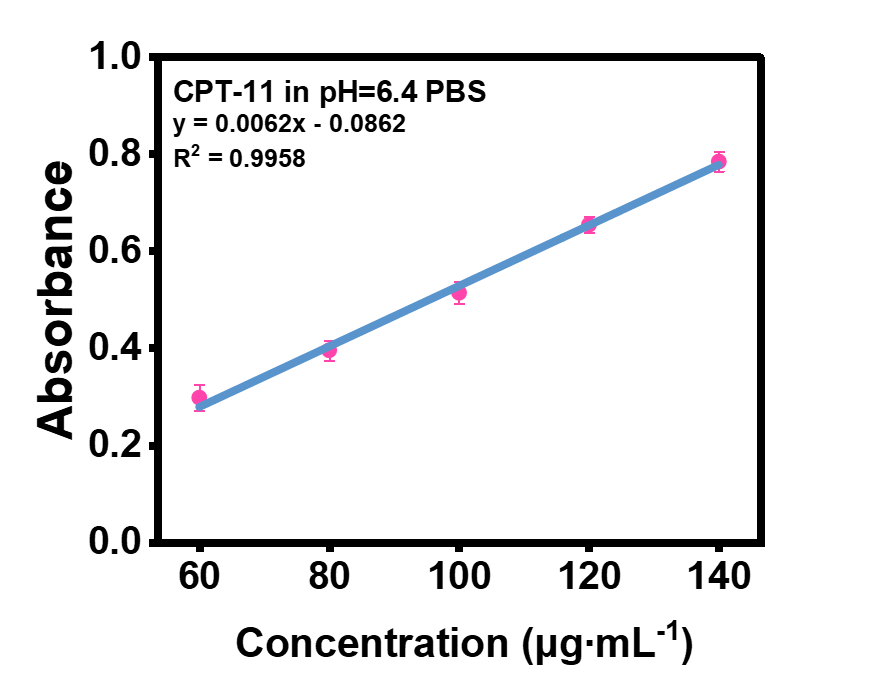


**Figure S5.** The relationship of the absorbance value at 370 nm with different concentrations of CPT-11 in pH=6.4 solution.


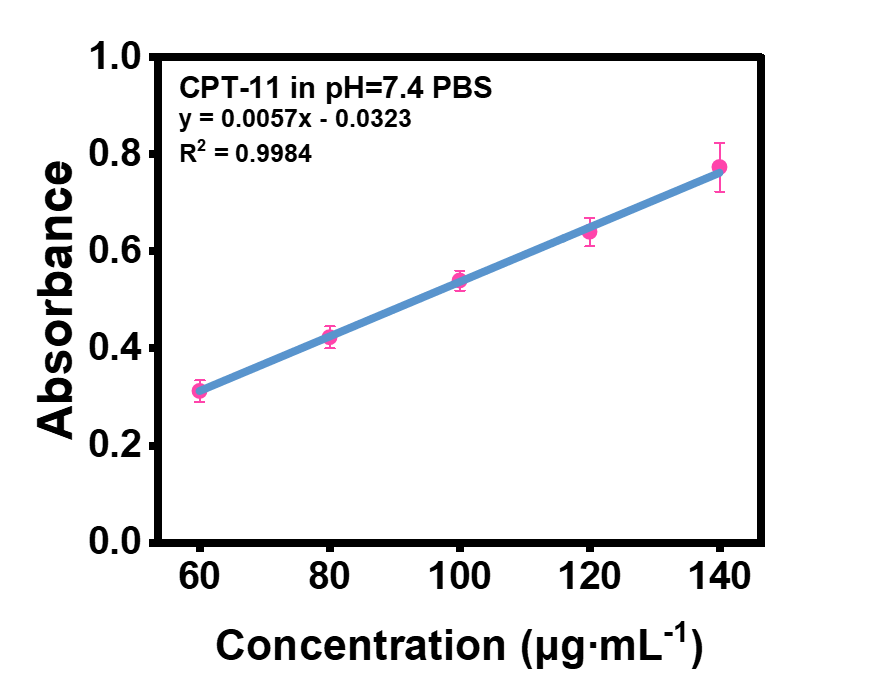


**Figure S6.** The relationship of the absorbance value at 370 nm with different concentrations of CPT-11 in pH=7.4 solution.


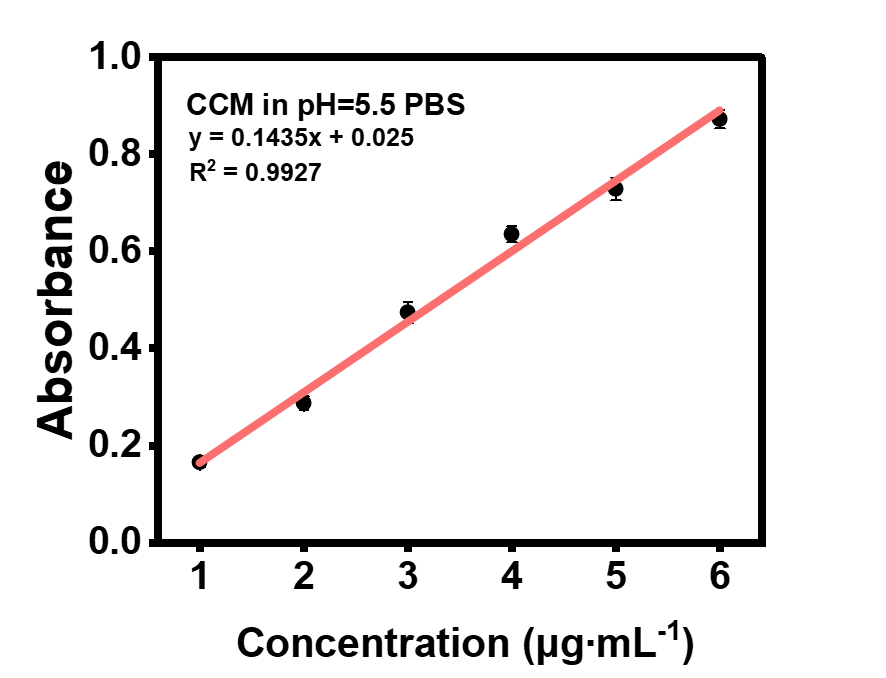


**Figure S7.** The relationship of the absorbance value at 420 nm with different concentrations of CCM in pH=5.5 solution.


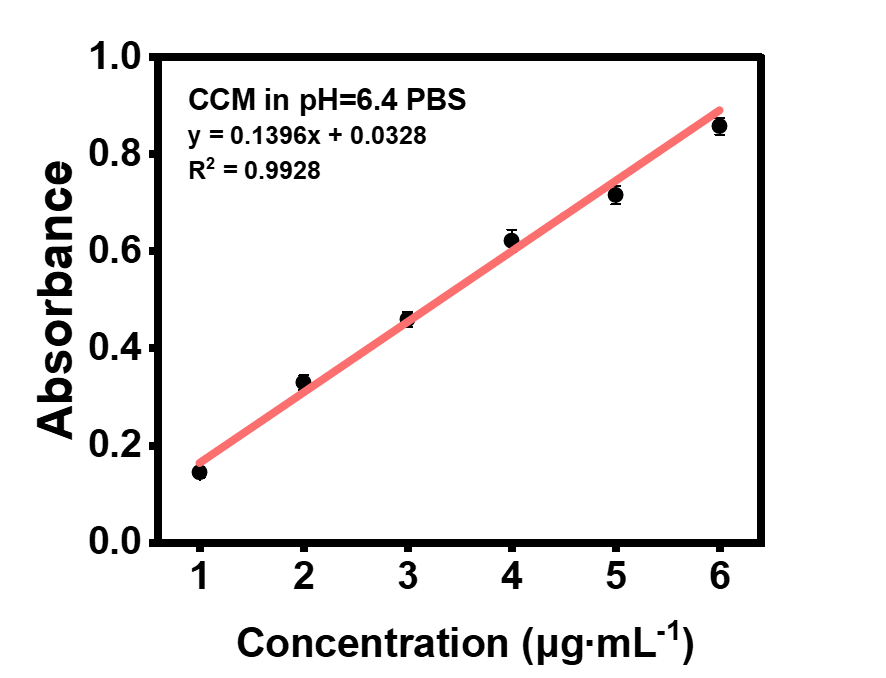


**Figure S8.** The relationship of the absorbance value at 420 nm with different concentrations of CCM in pH=6.4 solution.


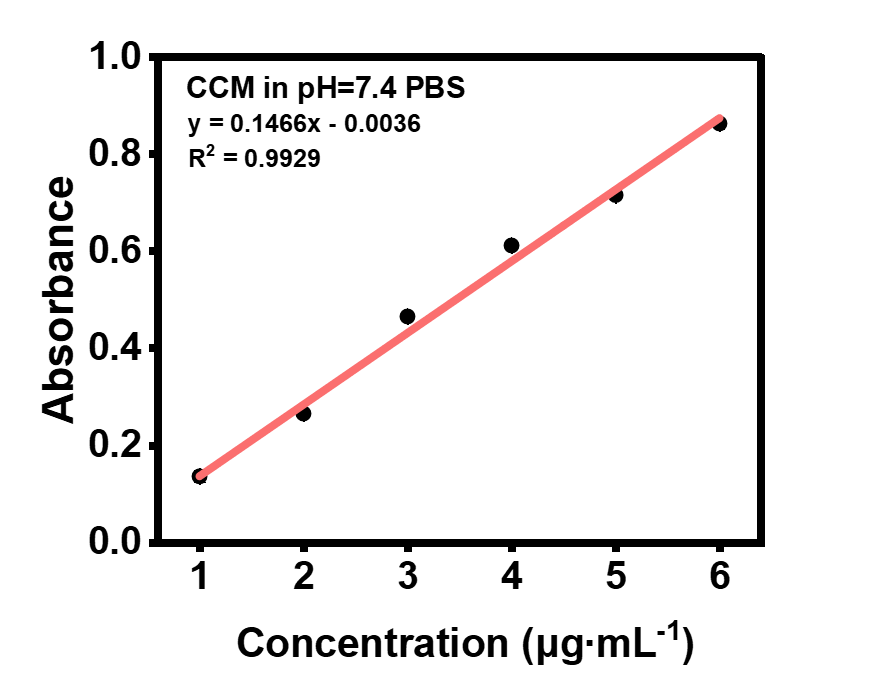


**Figure S9.** The relationship of the absorbance value at 420 nm with different concentrations of CCM in pH=7.4 solution.


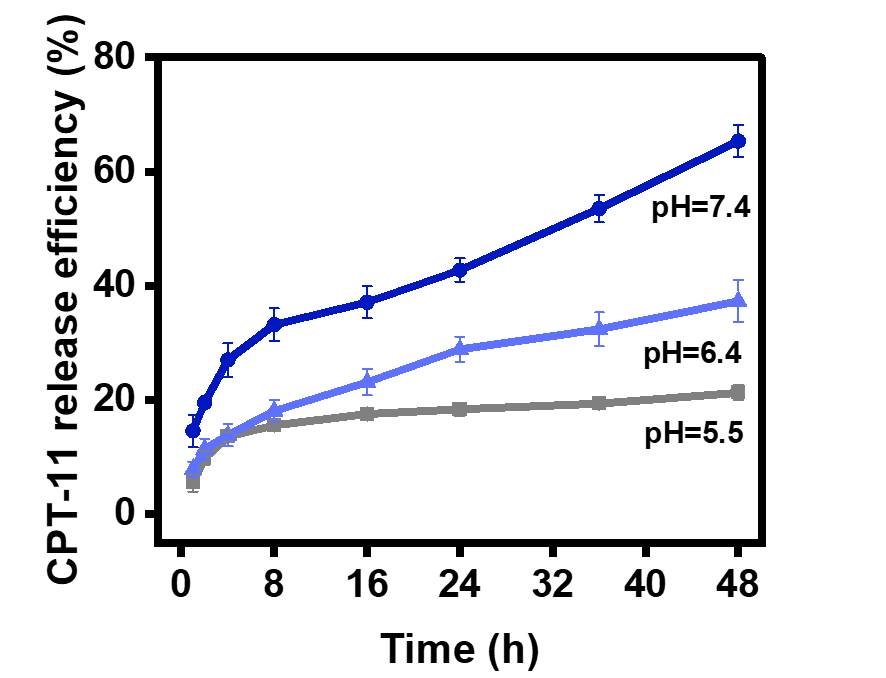


**Figure S10.** Release kinetics of CPT-11 from MZCC in PBS with different pH values (5.5, 6.4, and 7.4).

**Figure 11.** Release kinetics of CCM from MZCC in PBS with different pH values (5.5, 6.4, and 7.4).


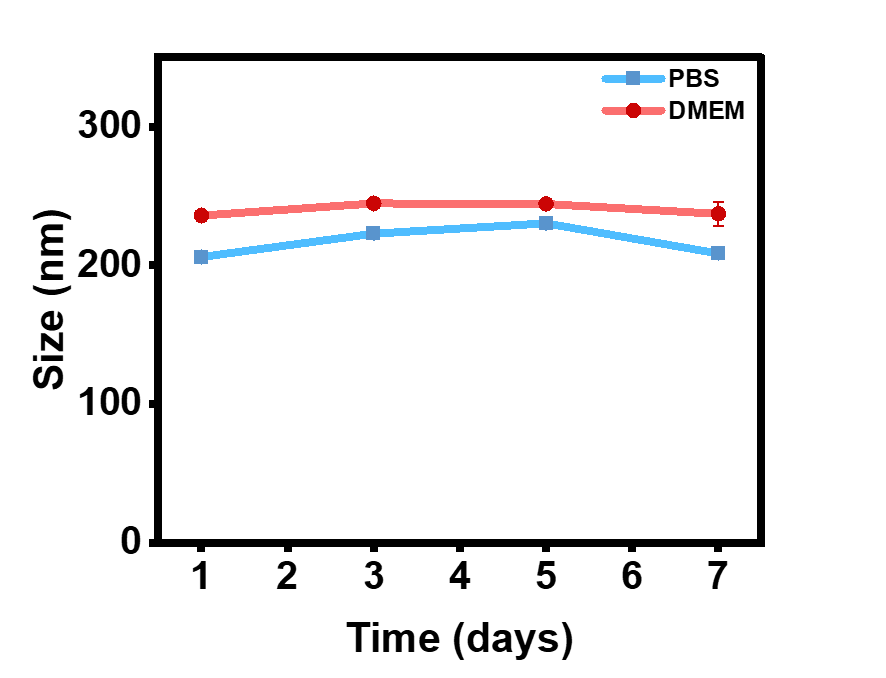


**Figure 12.** The size change of MZCC in PBS and DMEM medium.


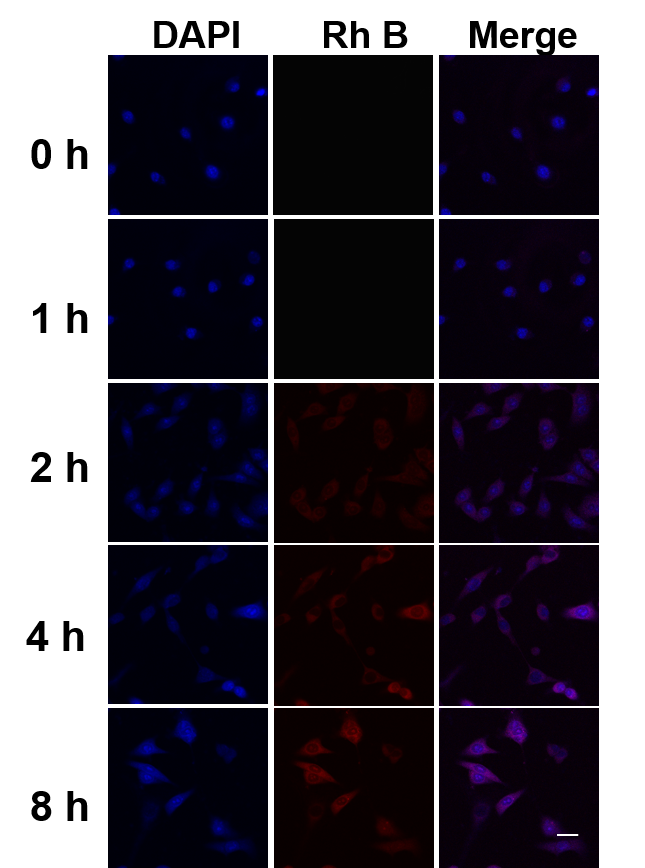


**Figure S13.** Cellular uptake behavior of MZCC was assessed by confocal laser scanning microscopy. Scale bar: 25 m.


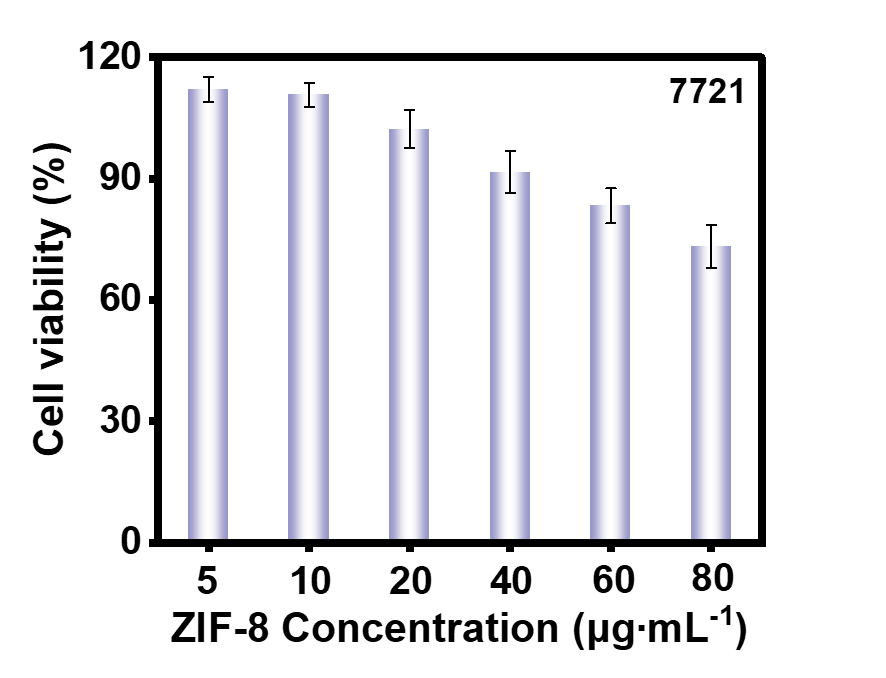


**Figure S14.** Cell viability of 7721 cells after treated with different concentrations of ZIF-8 for 24 h.


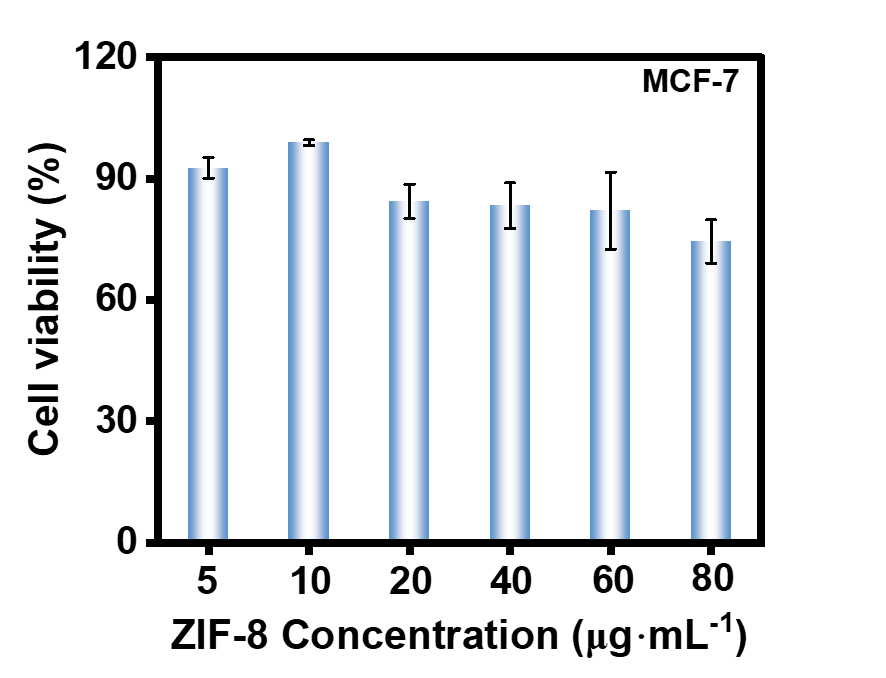


**Figure S15.** Cell viability of MCF-7 cells after treated with different concentrations of ZIF-8 for 24 h.


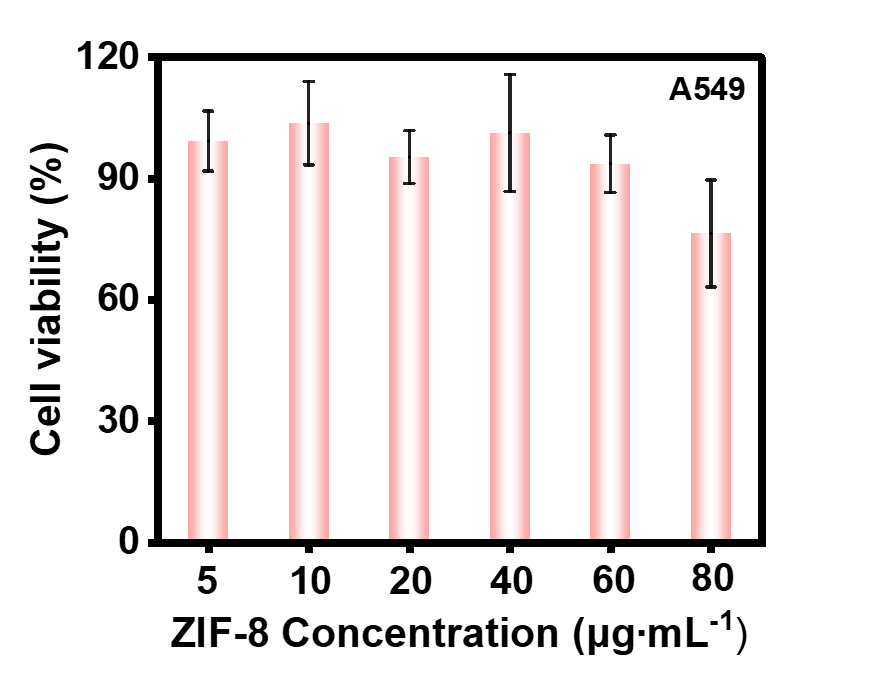


**Figure S16.** Cell viability of A549 cells after treated with different concentrations of ZIF-8 for 24 h.


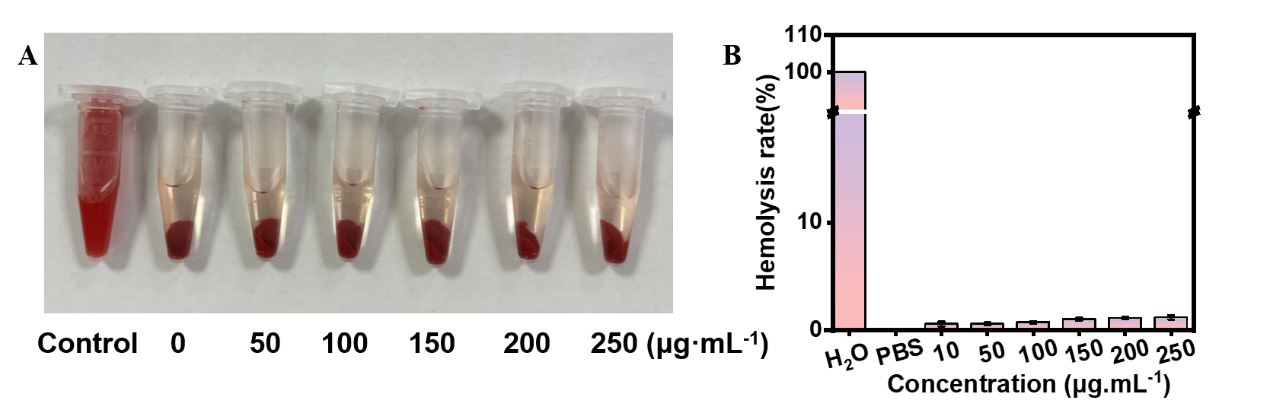


**Figure S17.** Hemolysis test of ZIF-8.


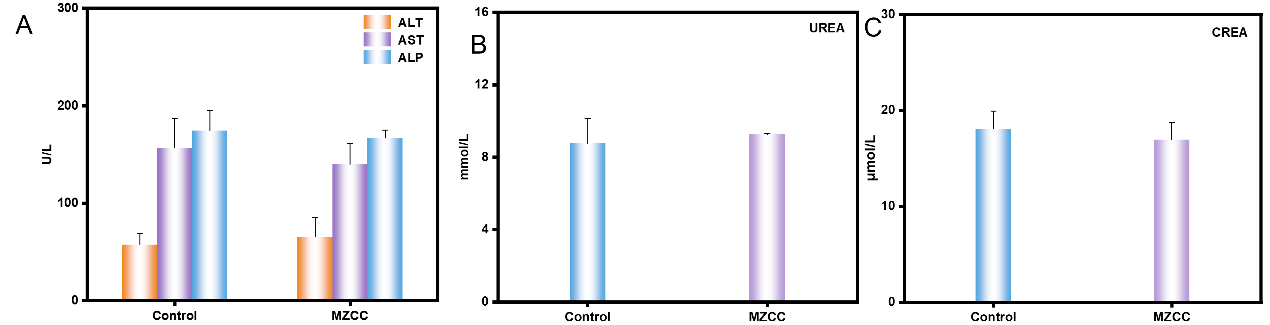


**Figure S18.** Blood biochemistry and hematology analysis of control and MZCC treated group.
